# Supplementary material for: Comparative epigenomics by machine learning approach for neuroblastoma
Source: PubMed Central journal article supplement (PMC9793522; doi:10.1186/s12864-022-09061-y), 2022-12-27
Supplement: 12864_2022_9061_MOESM1_ESM.pdf [file 12864_2022_9061_MOESM1_ESM.pdf]

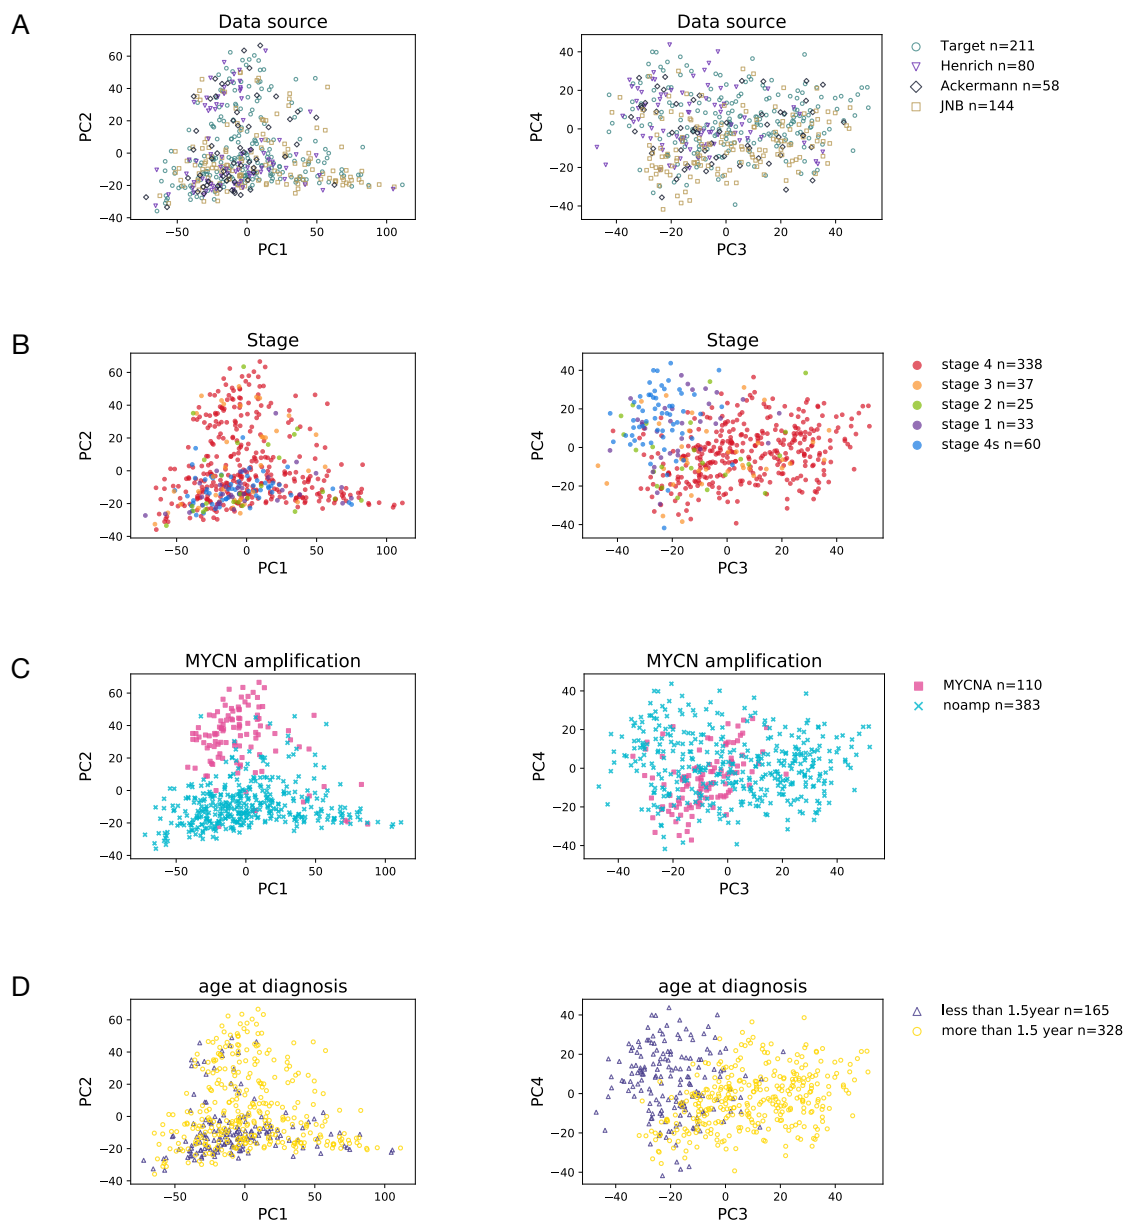

**Fig. S1 PCA result for sample categories.** PC1-4 were colored by each classification

scheme. Marker information were listed in each figure. A) Data source. B) INSS stage.

C) *MYCN* amplification status. D) Age at diagnosis.

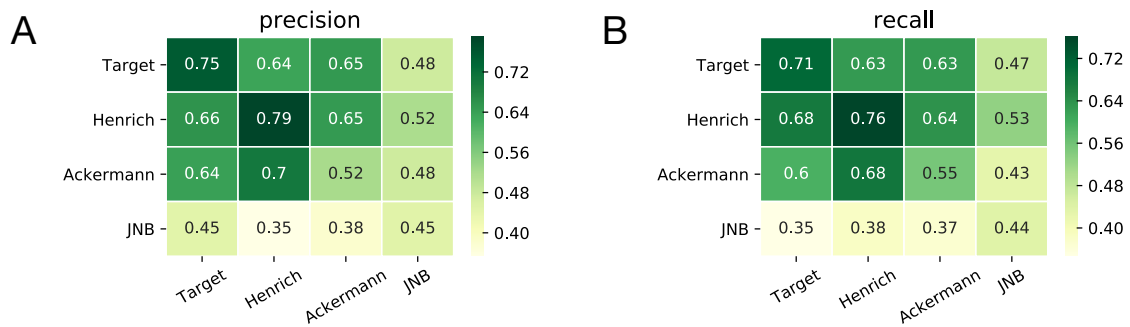

**Fig. S2 Intra-dataset prediction ability.** Training dataset were listed on y-axis and test data was listed on x-axis. (A) Precision. (B) recall.

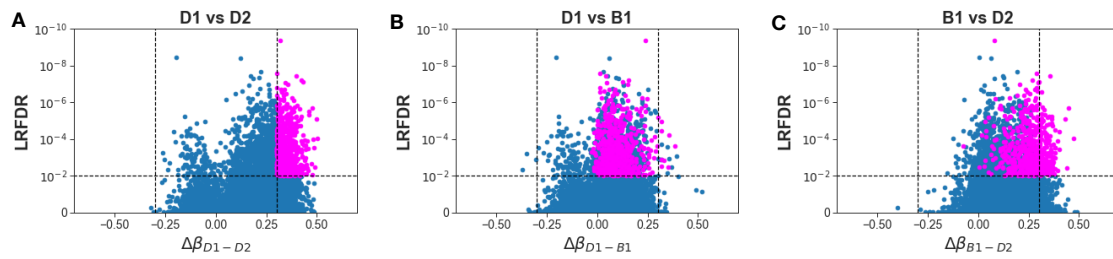

**Fig. S3 Relationship between  $|\Delta\beta_{|D1-D2|}$  and log rank test's FDR (LRFDR).** (A)  $|\Delta\beta_{|D1-D2|}$  was calculated between D1 and D2. (B)  $|\Delta\beta_{|D1-D2|}$  was calculated between B1 and D2. (C)  $|\Delta\beta_{|D1-D2|}$  was calculated between B1 and D2. Purple marker indicated  $|\Delta\beta_{|D1-D2|} > 0.3$  and  $LRFDR < 0.01$ .

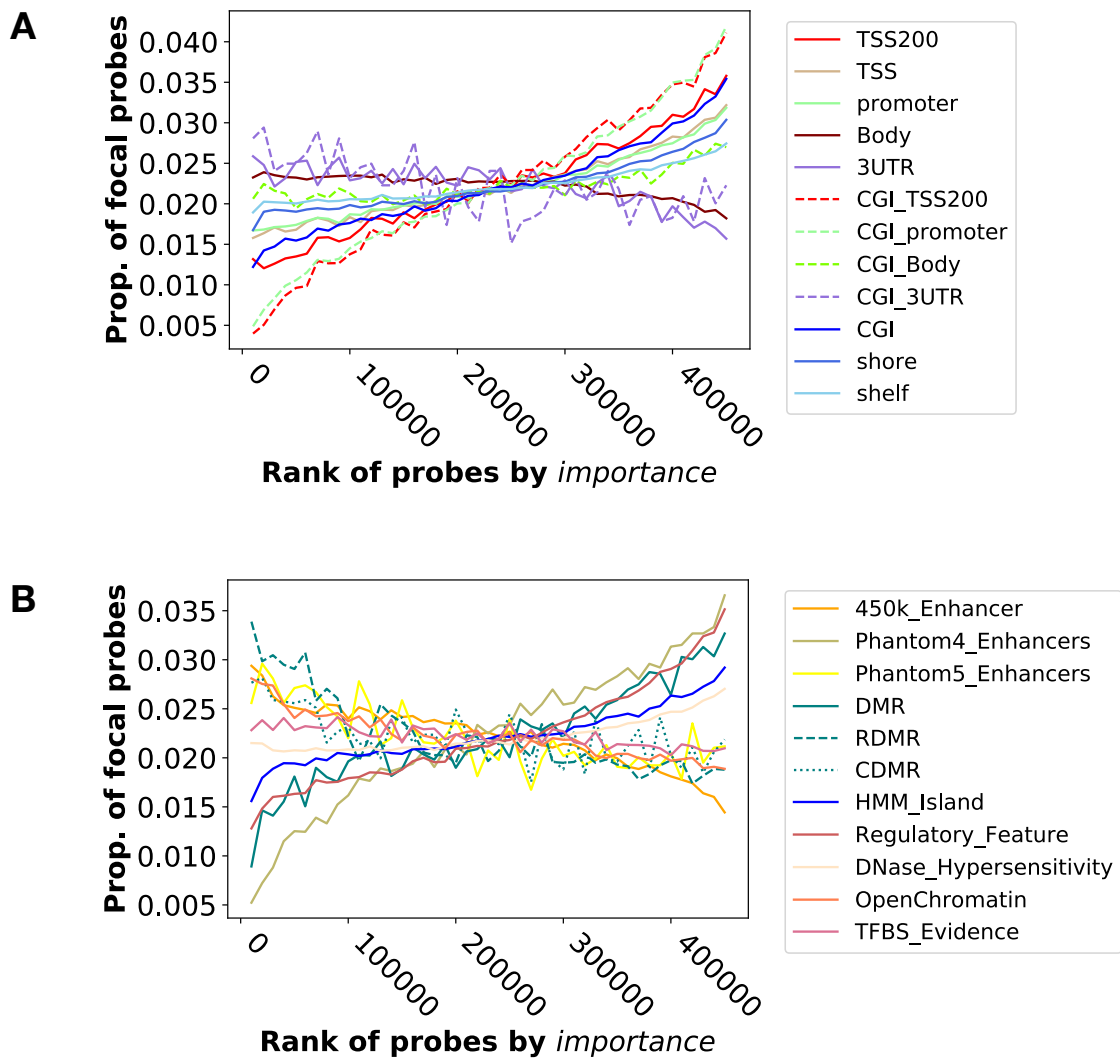

**Fig. S4 Distribution of probe annotation groups in binned *importance*.** x-axis is the ranked probes by *importance*. y-axis is the proportion of probes in the focal bin. Probe annotation group was colored.

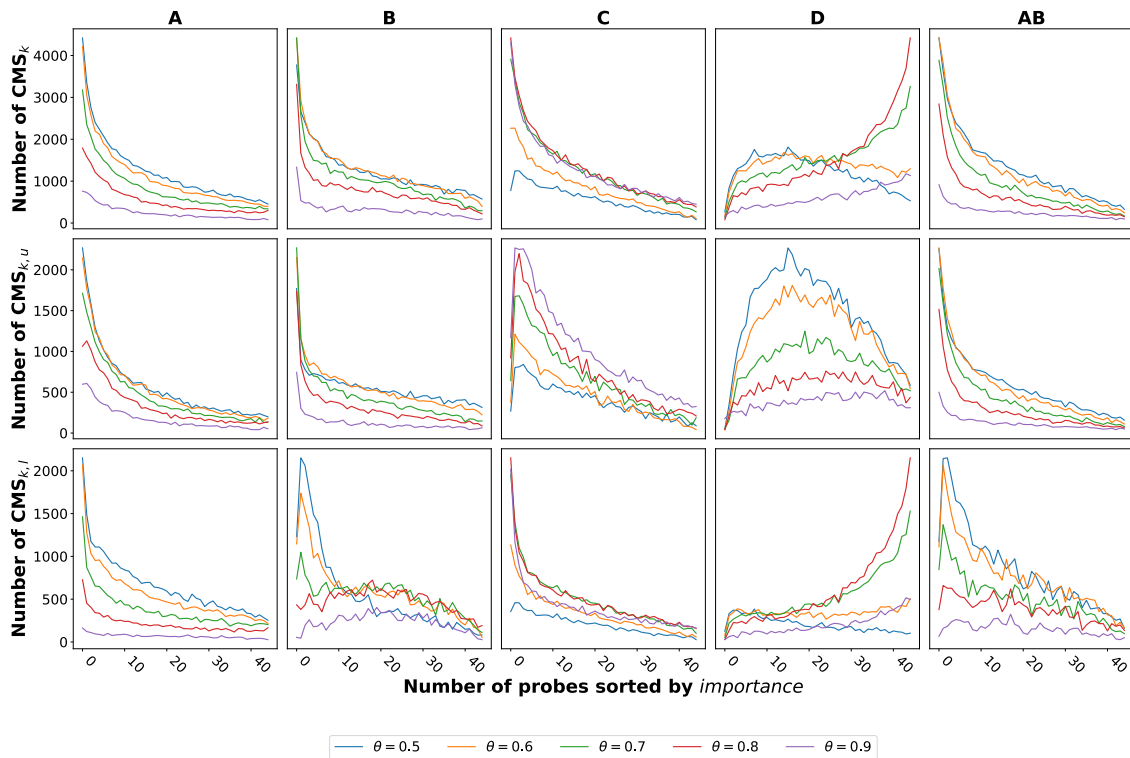

**Fig. S5 Relationship between rank by *importance* and number of classifying**

**probes. A)** x-axis is the ranked probes by *importance*. y-axis is the number of

classifying probes. Line color illustrated each  $\theta$ . Top row showed the number of  $CMS_k$ .

In the middle and bottom rows, it was shown the number of  $CMS_k$  with upper and lower

than  $r_0$ , respectively. Column label indicated focal class.

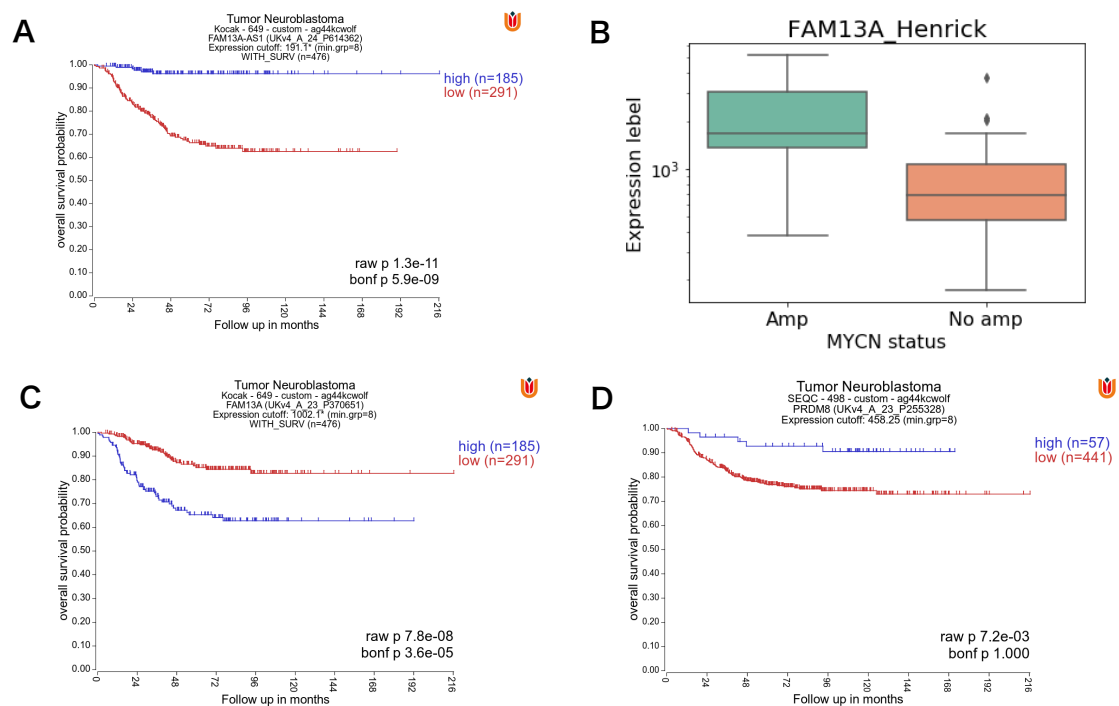

**Fig. S6** A) Survival time analysis of 476 NB patients divided by gene expression level of *FAM13A-AS*. Gene expression data and survival time data were obtained from the R2 database (<https://hgserver1.amc.nl/>). Kocak data were selected. “Scan” option was selected for sample grouping. B) Gene expression level of *FAM13A* for the data of Henrich *et al.* [22]. Box plot of *FAM13A* gene expression in MYCN-amplified (n = 33) and non-amplified (n = 72) tumors. C) Kaplan–Meier survival curves of 476 patients with NB divided by *FAM13A* expression, with same setting of Fig. S6A. D) Kaplan–Meier survival curves of 498 patients with NB divided by *PRDM8* expression with same setting of Fig. S6A. Gene expression data were obtained from the SEQC data.

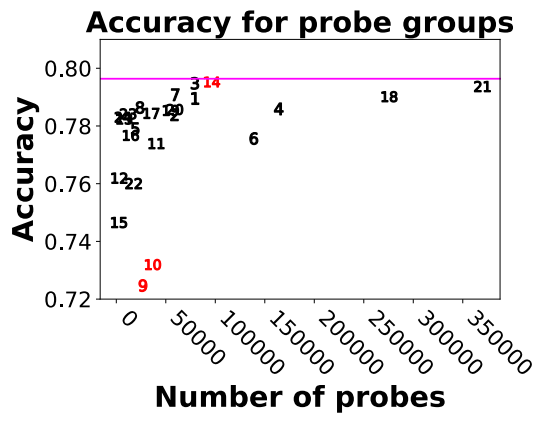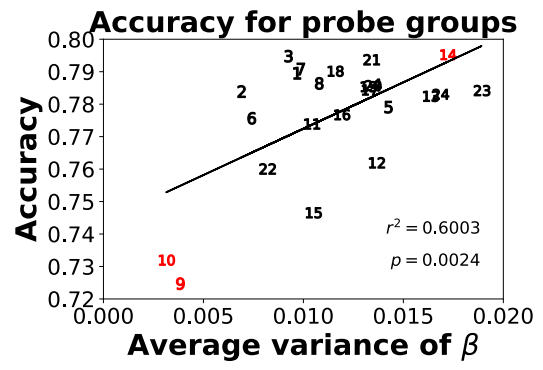

**Fig. S7 Remake fig 3 for accuracy as index.**

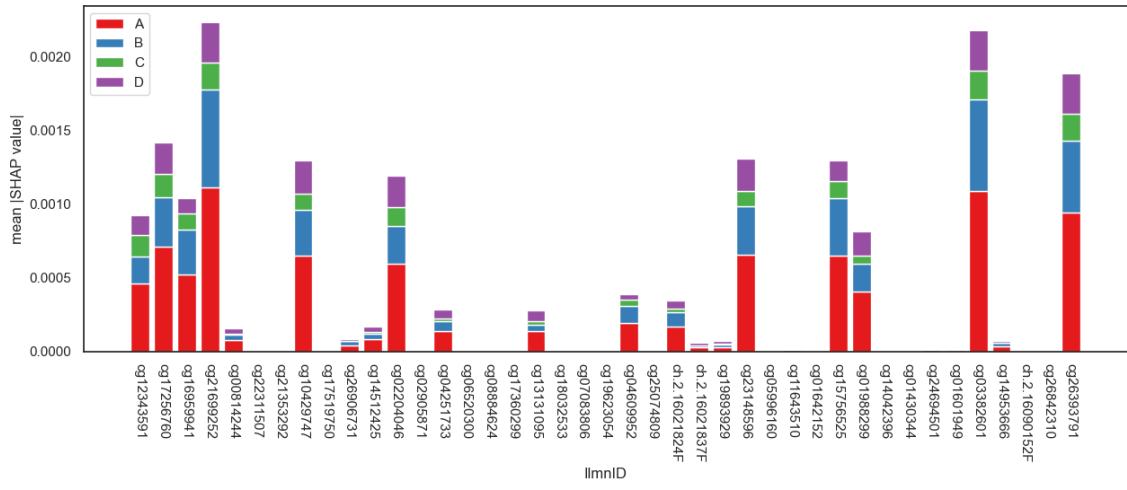

**Fig. S8 Probe contribution of classification measuring by SHAP value.**

| Dataset                   | Target | Henrich | Ackerman | JNB | total |  |
|---------------------------|--------|---------|----------|-----|-------|--|
| <b>INSS stage</b>         |        |         |          |     |       |  |
| 4                         | 165    | 41      | 29       | 103 | 338   |  |
| 3                         | 6      | 8       | 5        | 18  | 37    |  |
| 2                         | 1      | 8       | 9        | 7   | 25    |  |
| 1                         | 15     | 8       | 7        | 3   | 33    |  |
| 4s                        | 24     | 15      | 8        | 13  | 60    |  |
| Total                     | 211    | 80      | 58       | 144 | 493   |  |
| <b>MYCN amplification</b> |        |         |          |     |       |  |
| Y                         | 50     | 25      | 15       | 20  | 110   |  |
| N                         | 161    | 55      | 43       | 124 | 383   |  |
| Total                     | 211    | 80      | 58       | 144 | 493   |  |

**Table S1. Number of samples used in this study.**



| Probe annotation | probe_num | A_fl   | B_fl   | var    |
|------------------|-----------|--------|--------|--------|
| promoter         | 78798     | 0.8955 | 0.8650 | 0.0096 |
| TSS200           | 58151     | 0.8724 | 0.8597 | 0.0068 |
| TSS              | 78798     | 0.8917 | 0.8682 | 0.0092 |
| Body             | 163726    | 0.8912 | 0.8670 | 0.0136 |
| 3UTR             | 18534     | 0.8692 | 0.8576 | 0.0142 |
| CGI              | 138386    | 0.8867 | 0.8528 | 0.0073 |
| shore            | 58921     | 0.9021 | 0.8660 | 0.0098 |
| shelf            | 23349     | 0.8839 | 0.8666 | 0.0107 |
| CGI_promoter     | 26416     | 0.8337 | 0.8018 | 0.0038 |
| CGI_TSS200       | 36313     | 0.8545 | 0.8065 | 0.0031 |
| CGI_Body         | 39719     | 0.8688 | 0.8574 | 0.0104 |
| CGI_3UTR         | 2259      | 0.8724 | 0.8409 | 0.0136 |
| pha5enha         | 7269      | 0.8887 | 0.8584 | 0.0163 |
| 450Kenha         | 95986     | 0.8983 | 0.8698 | 0.0172 |
| pha5enha_CGI     | 2070      | 0.8862 | 0.8219 | 0.0104 |
| 450Kenha_CGI     | 14017     | 0.8978 | 0.8489 | 0.0119 |
| DMR              | 34643     | 0.8992 | 0.8551 | 0.0132 |
| DNase            | 275166    | 0.8928 | 0.8664 | 0.0115 |
| TFBS             | 54338     | 0.8837 | 0.8653 | 0.0132 |
| OpenChr          | 58724     | 0.8778 | 0.8661 | 0.0134 |
| SNP              | 369310    | 0.8985 | 0.8749 | 0.0133 |

**Table S2. Prediction ability of each probe annotation for group A and B**

|                      | 2yrs        | 5yrs        | 8yrs        |
|----------------------|-------------|-------------|-------------|
| selP5>RF             | 0.609±0.044 | 0.657±0.037 | 0.678±0.037 |
| selP5>PCA>RF         | 0.591±0.041 | 0.643±0.041 | 0.653±0.035 |
| selP5>LDA>RF         | 0.613±0.045 | 0.655±0.037 | 0.677±0.036 |
| selP5>CNN            | 0.61±0.046  | 0.644±0.051 | 0.665±0.049 |
| selP5>PCA>CNN        | 0.602±0.04  | 0.638±0.041 | 0.664±0.037 |
| selP5>LDA>CNN        | 0.607±0.039 | 0.637±0.036 | 0.666±0.04  |
| selP5>SVM_rbf        | 0.6±0.036   | 0.55±0.053  | 0.575±0.048 |
| selP5>PCA>SVM_rbf    | 0.585±0.042 | 0.576±0.049 | 0.599±0.05  |
| selP5>LDA>SVM_rbf    | 0.61±0.037  | 0.629±0.038 | 0.659±0.041 |
| selP5>SVM_linear     | 0.618±0.042 | 0.628±0.04  | 0.654±0.039 |
| selP5>PCA>SVM_linear | 0.607±0.038 | 0.661±0.038 | 0.678±0.032 |
| selP5>LDA>SVM_linear | 0.612±0.036 | 0.636±0.035 | 0.668±0.038 |
| selP5>logistic       | 0.621±0.038 | 0.637±0.039 | 0.664±0.035 |
| selP5>PCA>logistic   | 0.604±0.038 | 0.652±0.04  | 0.673±0.036 |
| selP5>LDA>logistic   | 0.611±0.036 | 0.636±0.034 | 0.669±0.038 |

**Table S5. Mean accuracy and its standard deviation**

|             | RF    | XGB   | LGBM  | exTrees | logreg | CNN   | SVM_rbf | SVM_linear |
|-------------|-------|-------|-------|---------|--------|-------|---------|------------|
| mean_score  | 0.802 | 0.810 | 0.814 | 0.794   | 0.714  | 0.664 | 0.703   | 0.693      |
| A_precision | 0.932 | 0.963 | 0.971 | 0.932   | 0.911  | 0.893 | 0.905   | 0.872      |
| B_precision | 0.838 | 0.847 | 0.844 | 0.811   | 0.836  | 0.820 | 0.829   | 0.850      |
| C_precision | 0.625 | 0.626 | 0.642 | 0.603   | 0.612  | 0.582 | 0.587   | 0.563      |
| D_precision | 0.577 | 0.556 | 0.577 | 0.644   | 0.563  | 0.465 | 0.578   | 0.504      |
| A_recall    | 0.894 | 0.939 | 0.943 | 0.877   | 0.897  | 0.879 | 0.893   | 0.895      |
| B_recall    | 0.925 | 0.929 | 0.929 | 0.954   | 0.900  | 0.889 | 0.900   | 0.851      |
| C_recall    | 0.654 | 0.613 | 0.664 | 0.584   | 0.667  | 0.580 | 0.596   | 0.589      |
| D_recall    | 0.403 | 0.414 | 0.417 | 0.356   | 0.411  | 0.355 | 0.420   | 0.465      |
| A_f1        | 0.911 | 0.950 | 0.956 | 0.902   | 0.902  | 0.882 | 0.897   | 0.881      |
| B_f1        | 0.879 | 0.885 | 0.884 | 0.876   | 0.866  | 0.849 | 0.862   | 0.849      |
| C_f1        | 0.630 | 0.606 | 0.642 | 0.576   | 0.624  | 0.547 | 0.579   | 0.564      |
| D_f1        | 0.467 | 0.464 | 0.474 | 0.445   | 0.465  | 0.377 | 0.474   | 0.475      |

**Table S6. Classification ability was compared**
